# Supplementary material for: Bioorthogonal Chemistry Approach for the Theranostics of GRPR-Expressing Cancers
Source: MDPI journal article supplement (doi:10.3390/pharmaceutics14122569), 2022-11-23
Supplement: s1 [file s1]

# Bioorthogonal Chemistry Approach for Theranostics of GRPR-Expressing Cancers

A. D'Onofrio <sup>1,\*</sup>, F. Silva <sup>1,\*\*</sup>, L. Gano <sup>1,2</sup>, P. Raposinho <sup>1,2</sup>, C. Fernandes <sup>1,2</sup>, A. Sikora <sup>3</sup>, M. Orzełowska <sup>3</sup>,  
R. Mikołajczak <sup>3</sup>, P. Garnuszek <sup>3</sup>, A. Paulo <sup>1,2~</sup>

1 Centro de Ciências e Tecnologias Nucleares, Instituto Superior Técnico, Universidade de Lisboa, Campus Tecnológico e Nuclear, Estrada Nacional 10, Km 139.7, 2695-066 Bobadela LRS, Portugal

2 Departamento de Engenharia e Ciências Nucleares, Instituto Superior Técnico, Universidade de Lisboa, Portugal

3 National Centre for Nuclear Research, Radioisotope Centre POLATOM, Otwock, Poland

\* Correspondence: [alicedonofrio@gmail.com](mailto:alicedonofrio@gmail.com)

\*\* Present address: Champalimaud Centre for the Unknown, Fundação Champalimaud, Av. Brasília, 1400-038 Lisboa

## Table of Contents

|            |     |
|------------|-----|
| Figure S1. | 2-4 |
| Figure S2. | 5   |
| Figure S3. | 5   |
| Table S1.  | 6   |
| Figure S4. | 6   |
| Table S2.  | 7   |
| Table S3.  | 7   |
| Table S4.  | 8   |
| Table S5.  | 8   |

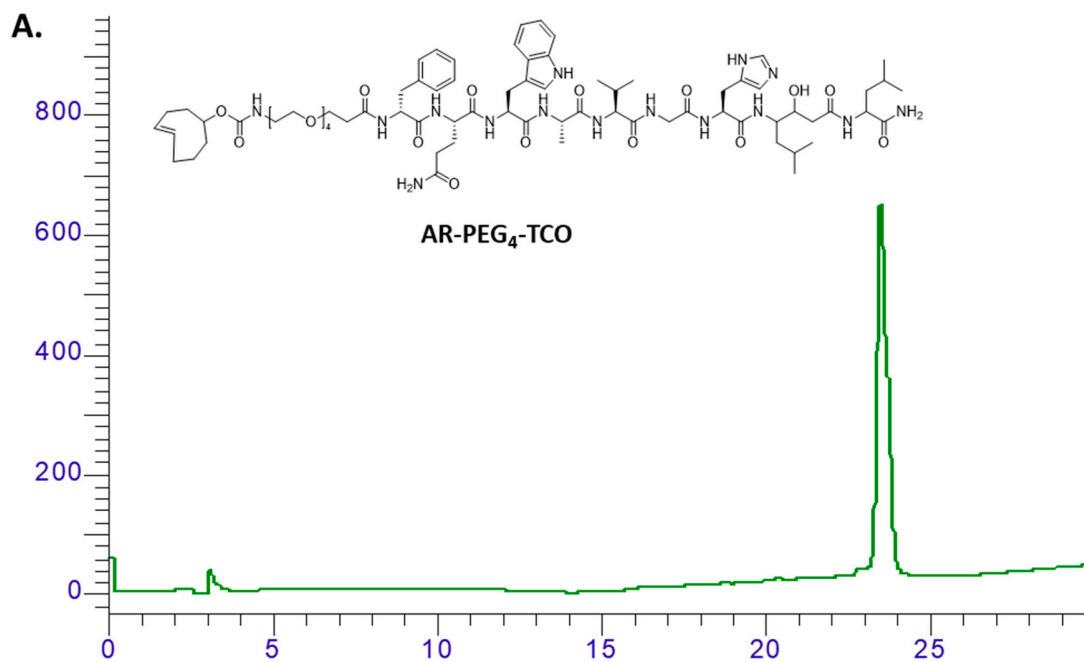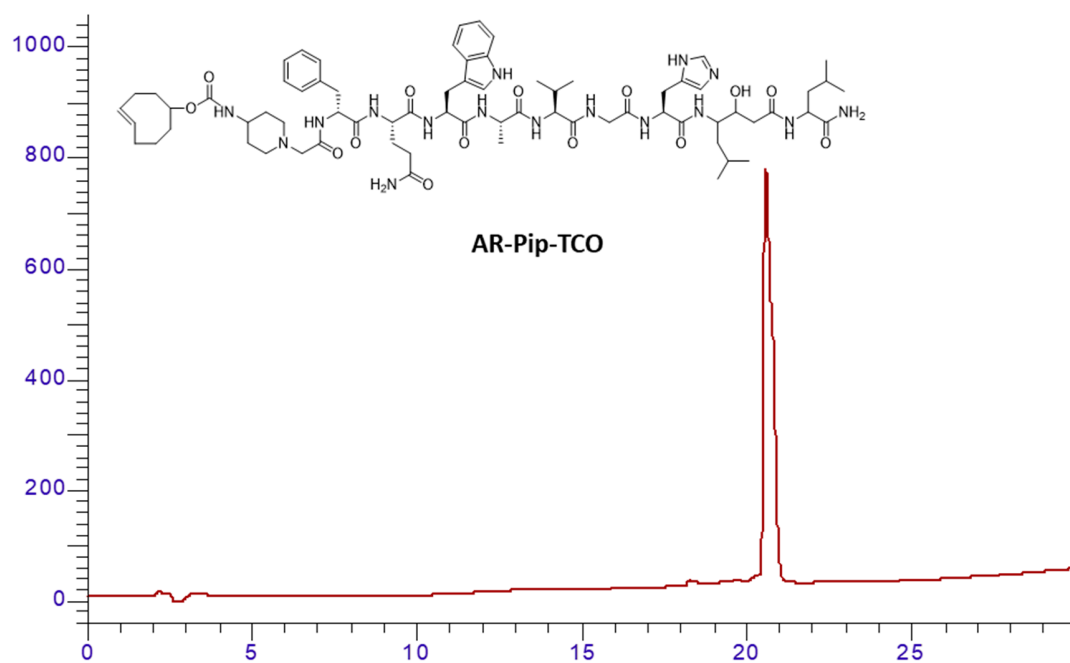

**B.**

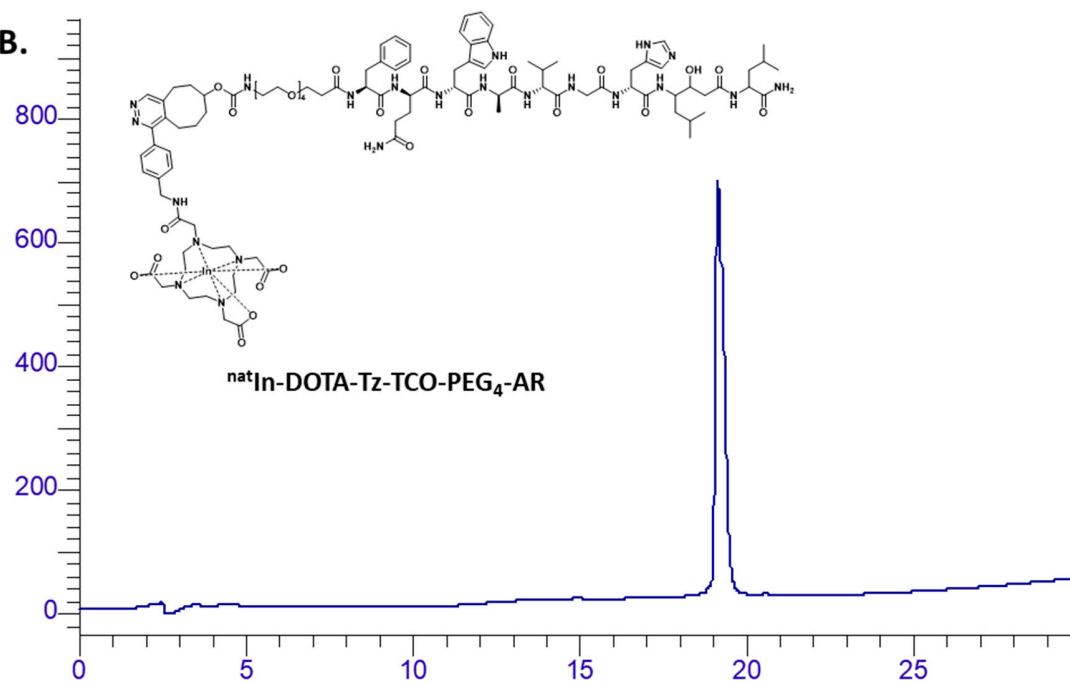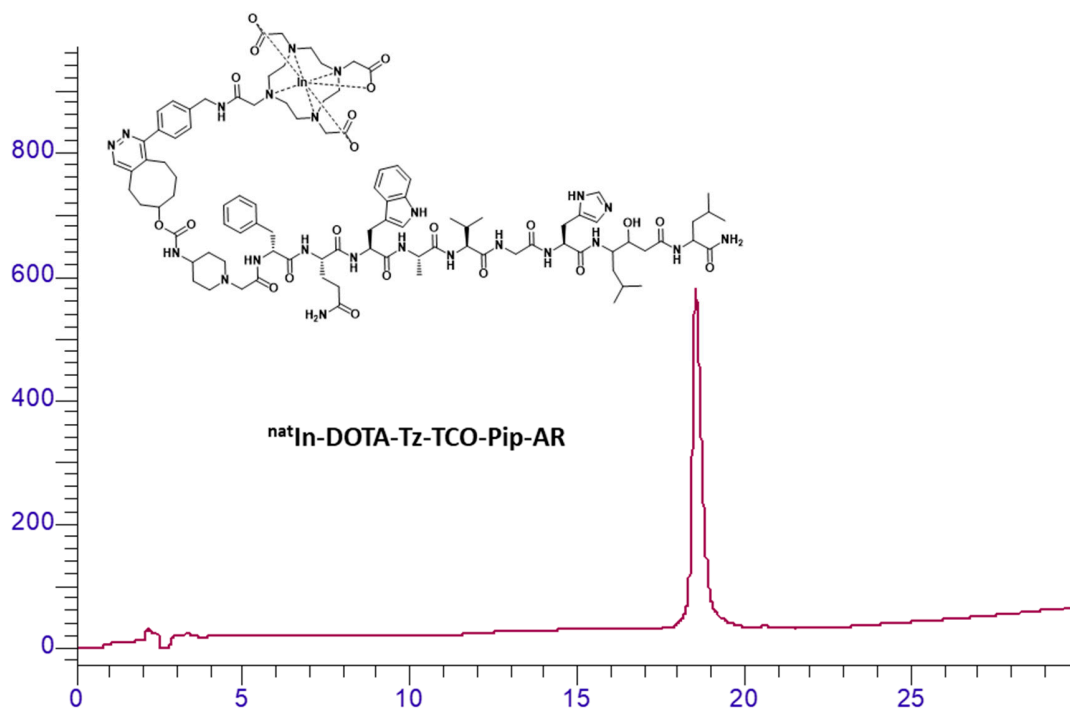

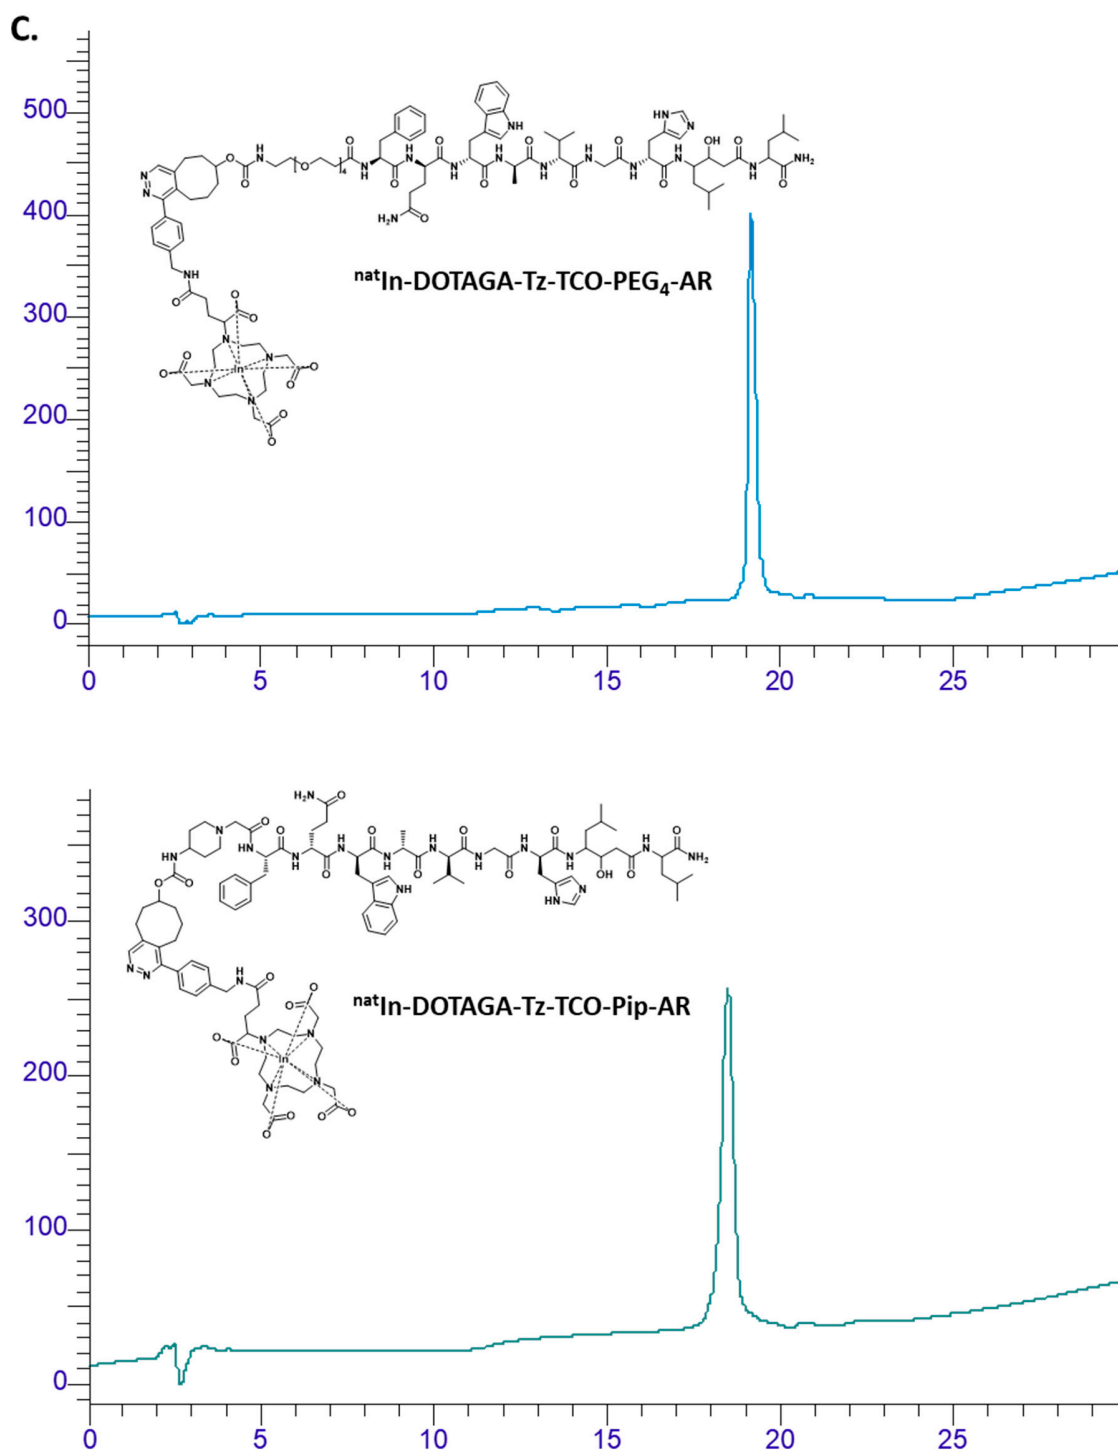

**Figure S1.** HPLC analysis (UV detection at 220 nm) of the **A.** TCO-bearing peptides with the PEG<sub>4</sub> and Pip linkers (Rt = 23.6 and 20.9 min, respectively) **B.** the corresponding cold DOTA-based <sup>nat</sup>In-conjugates (Rt = 19.1 and 18.5 min, respectively) and **C.** DOTAGA-based <sup>nat</sup>In-conjugates (Rt = 19.4 and 18.6 min, respectively).

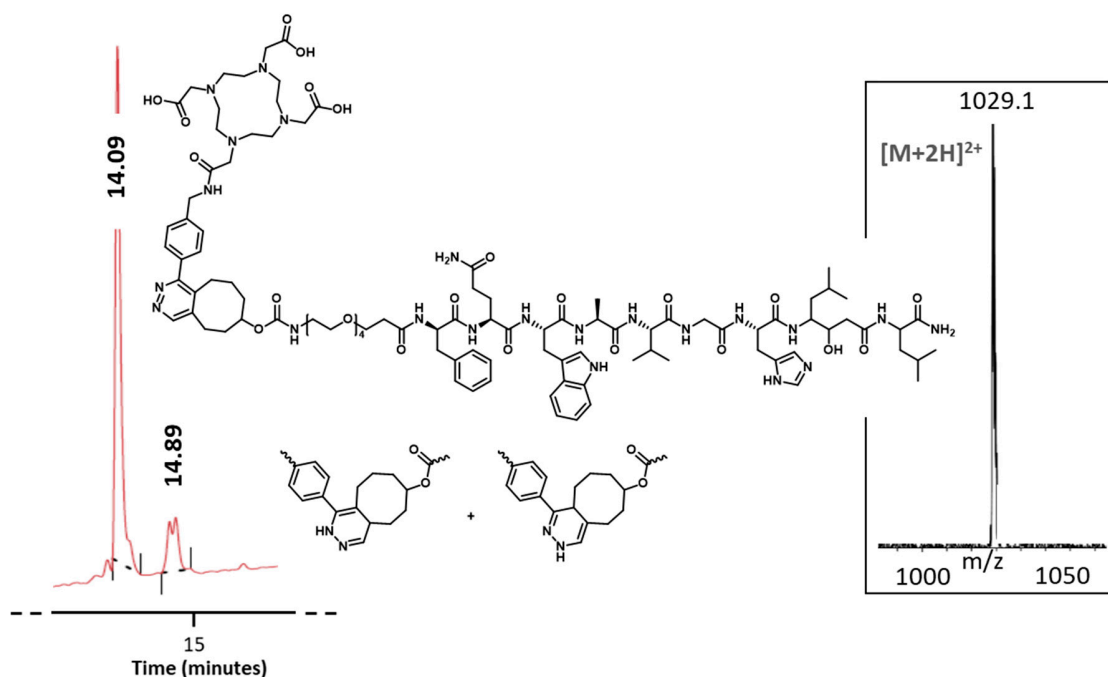

**Figure S2.** HPLC analysis of the formation of the dihydropyridazine isomers ( $t_R = 14.9$  min) upon click reaction leading to the formation of the compound DOTA-Tz-TCO-PEG4-AR ( $t_R = 14.1$  min).

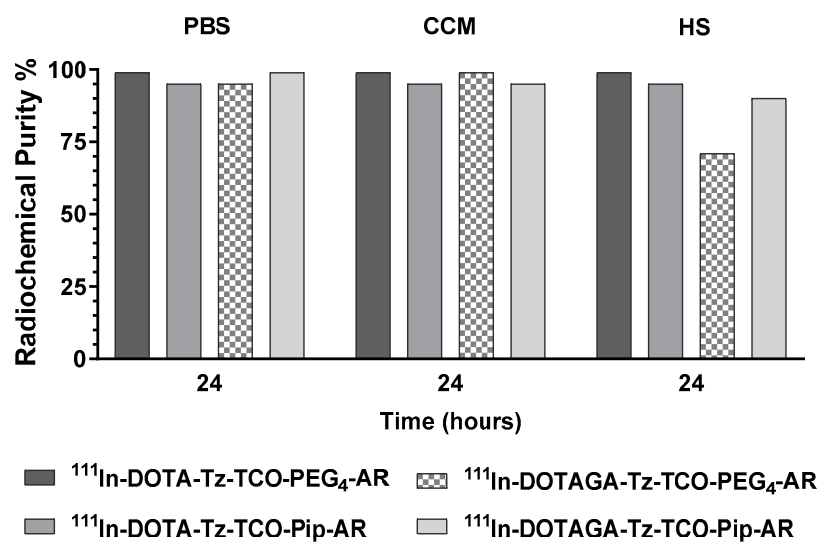

**Figure S3.** Radiochemical purity (estimated by HPLC) of the radioconjugates after incubation in different media (PBS, RPMI 1640 medium supplemented with 10% FBS and 1% Penicillin/Streptomycin and Human Serum) at 37°C for 24 hours.

**Table S1.** Binding Affinity expressed as IC50 values obtained by non-linear regression analysis of competitive binding assay (two-sites).

|               | In-DOTA-Tz-<br>TCO-PEG4-AR | In-DOTA-Tz-<br>TCO-Pip-AR | In-DOTAGA-Tz-<br>TCO-PEG4-AR | In-DOTAGA-Tz-<br>TCO-Pip-AR | Tyr4-BBN |
|---------------|----------------------------|---------------------------|------------------------------|-----------------------------|----------|
| <b>IC50Hi</b> | 6.20E-14                   | 1.36E-12                  | 5.89E-13                     | 1.23E-13                    | /        |
| <b>IC50Lo</b> | 1.01E-10                   | 6.19E-10                  | 1.13E-10                     | 9.00E-10                    | 5.73E-10 |

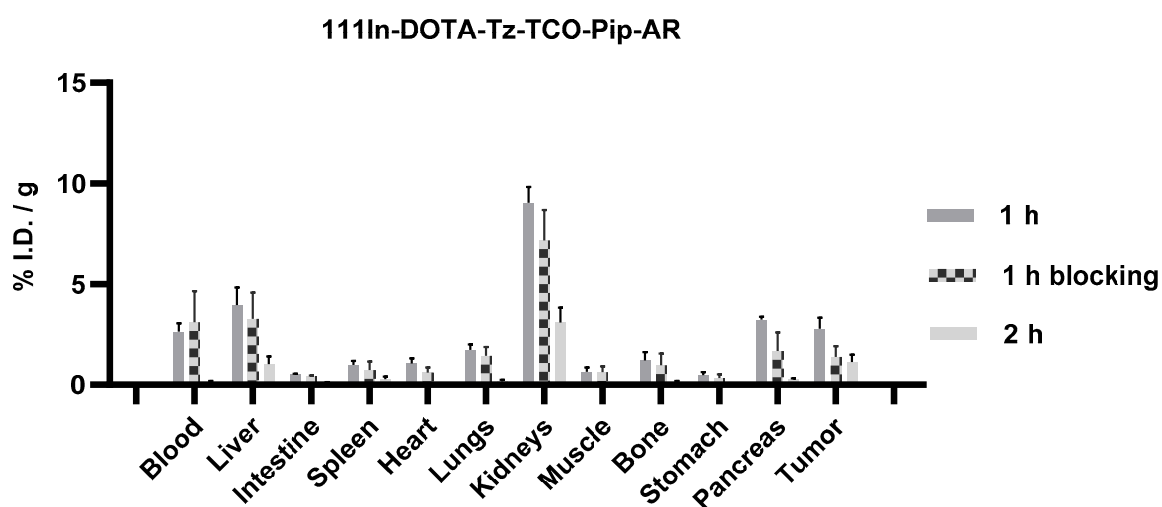

**Figure S4.** Biodistribution data for [<sup>111</sup>In]In-DOTA-Tz-TCO-Pip-AR in PC3 xenografts bearing mice, expressed as % I.D./g of organ (mean ± S.D., n = 3).

**Table S2.** Biodistribution data of [<sup>111</sup>In]In-DOTA-Tz-TCO-PEG4-AR in PC3-xenografts bearing mice at 15 min, 1 h (with and without blocking), 2 h and 24 hours p.i. (data expressed as mean % I.D./g and SD, n = 3).

| 111In-DOTA-Tz-TCO-PEG4-AR |           | MEAN   | SD  | MEAN   | SD    | MEAN         | SD    | MEAN | SD  | MEAN  | SD     |
|---------------------------|-----------|--------|-----|--------|-------|--------------|-------|------|-----|-------|--------|
|                           |           | 15 min |     | 1 h    |       | 1 h blocking |       | 2 h  |     | 24 h  |        |
|                           | Blood     | 6.7    | 1.4 | 2.62   | 0.74  | 3.08         | 0.46  | 1.7  | 0.7 | 0.16  | 0.01   |
|                           | Liver     | 6      | 1.2 | 1.15   | 0.275 | 1.63         | 0.44  | 1.7  | 0.3 | 0.21  | 0.02   |
|                           | Intestine | 3.6    | 0.3 | 1.855  | 0.365 | 0.995        | 0.51  | 1.1  | 0.3 | 0.12  | 0.09   |
|                           | Spleen    | 3.6    | 1.5 | 1.32   | 0.75  | 0.83         | 0.21  | 0.6  | 0.4 | 0.065 | 0.006  |
|                           | Heart     | 5.4    | 2.1 | 0.815  | 0.19  | 1.11         | 0.18  | 0.5  | 0.2 | 0.065 | 0.005  |
|                           | Lungs     | 9.6    | 0.1 | 1.615  | 0.43  | 2.135        | 0.51  | 1.1  | 0.4 | 0.12  | 0.02   |
|                           | Kidneys   | 15.4   | 6.2 | 5.335  | 0.625 | 8.435        | 1.88  | 5.4  | 2.2 | 1.17  | 0.23   |
|                           | Muscle    | 3.8    | 0.8 | 0.875  | 0.18  | 1.755        | 1.41  | 0.6  | 0.3 | 0.034 | 0.003  |
|                           | Bone      | 7.2    | 3.3 | 0.85   | 0.23  | 1.395        | 0.75  | 0.7  | 0.4 | 0.038 | 0.0014 |
|                           | Stomach   | 10.6   | 5.2 | 2.625  | 0.395 | 1.16         | 0.27  | 2.1  | 0.1 | 0.09  | 0.02   |
|                           | Pancreas  | 25.2   | 3   | 13.875 | 1.595 | 1.685        | 0.59  | 11   | 2.5 | 0.14  | 0.09   |
|                           | Tumor     | 8.4    | 0.5 | 9.575  | 1.705 | 4.445        | 1.97  | 13.1 | 1.7 | 0.76  | 0.09   |
|                           | Excretion | 17.4   | 9.8 | 74.85  | 7.05  | 51.85        | 14.35 | 84.7 | 8.7 | 96.8  | 0.2    |

**Table S3.** Biodistribution data of [<sup>111</sup>In]In-DOTA-Tz-TCO-Pip-AR in PC3-xenografts bearing mice at 1 h (with and without blocking) and 2h p.i. (data expressed as mean % I.D./g and SD, n = 3).

| 111In-DOTA-Tz-TCO-Pip-AR |           | MEAN | SD   | MEAN         | SD   | MEAN | SD   |
|--------------------------|-----------|------|------|--------------|------|------|------|
|                          |           | 1 h  |      | 1 h blocking |      | 2 h  |      |
|                          | Blood     | 2.63 | 0.42 | 3.11         | 1.55 | 0.16 | 0.03 |
|                          | Liver     | 3.97 | 0.86 | 3.28         | 1.3  | 1.02 | 0.38 |
|                          | Intestine | 0.54 | 0.02 | 0.4          | 0.07 | 0.09 | 0.04 |
|                          | Spleen    | 0.98 | 0.21 | 0.74         | 0.42 | 0.28 | 0.13 |
|                          | Heart     | 1.06 | 0.26 | 0.6          | 0.26 | 0.08 | 0.01 |
|                          | Lungs     | 1.74 | 0.26 | 1.44         | 0.44 | 0.18 | 0.06 |
|                          | Kidneys   | 9.04 | 0.79 | 7.18         | 1.5  | 3.09 | 0.75 |
|                          | Muscle    | 0.64 | 0.22 | 0.63         | 0.29 | 0.05 | 0.01 |
|                          | Bone      | 1.2  | 0.43 | 0.97         | 0.58 | 0.13 | 0.06 |
|                          | Stomach   | 0.48 | 0.14 | 0.34         | 0.17 | 0.05 | 0.02 |
|                          | Pancreas  | 3.24 | 0.15 | 1.67         | 0.94 | 0.28 | 0.04 |
|                          | Tumor     | 2.79 | 0.53 | 1.38         | 0.53 | 1.13 | 0.36 |
|                          | Excretion | 63.2 | 3.3  | 60.7         | 9    | 91.7 | 2.4  |

**Table S4.** Biodistribution data of [<sup>111</sup>In]In-DOTA-Tz in PC3-xenografts bearing mice at 15 min, 1 h and 24 hours p.i. (data expressed as mean % I.D./g and SD, n = 3).

| 111In-DOTA-Tz |           | MEAN   | SD   | MEAN | SD   | MEAN  | SD     |
|---------------|-----------|--------|------|------|------|-------|--------|
|               |           | 15 min |      | 1 h  |      | 24 h  |        |
|               | Blood     | 2.7    | 0.4  | 0.4  | 0.2  | 0.03  | 0.0002 |
|               | Liver     | 0.9    | 0.1  | 0.4  | 0.09 | 0.12  | 0.02   |
|               | Intestine | 0.4    | 0.1  | 0.29 | 0.08 | 0.09  | 0.04   |
|               | Spleen    | 0.45   | 0.05 | 0.14 | 0.06 | 0.08  | 0.01   |
|               | Heart     | 0.9    | 0.1  | 0.17 | 0.06 | 0.02  | 0.005  |
|               | Lungs     | 1.4    | 0.4  | 0.38 | 0.1  | 0.07  | 0.02   |
|               | Kidneys   | 4.4    | 0.5  | 2.1  | 0.7  | 0.87  | 0.14   |
|               | Muscle    | 0.8    | 0.4  | 0.1  | 0.03 | 0.021 | 0.005  |
|               | Bone      | 0.8    | 0.2  | 0.2  | 0.1  | 0.04  | 0.01   |
|               | Stomach   | 0.4    | 0.2  | 0.17 | 0.06 | 0.03  | 0.01   |
|               | Pancreas  | 0.42   | 0.02 | 0.09 | 0.06 | 0.03  | 0.01   |
|               | Tumor     | 2.46   | 0.6  | 0.5  | 0.2  | 0.13  | 0.04   |
|               | Excretion | 61.2   | 8    | 88   | 4.2  | 97.3  | 0.9    |

**Table S5.** Biodistribution data of the GRPR pre-targeting approach by injection of [<sup>111</sup>In]In-DOTA-Tz 4h p.i. of AR-PEG4-TCO (50 µg) in PC3-xenografts bearing mice at 15 min and 1 h (with and without blocking) p.i. (data expressed as mean % I.D./g and SD, n = 3).

| 111In-DOTA-Tz + AR-PEG4-TCO |           | MEAN   | SD    | MEAN  | SD    | MEAN         | SD   |
|-----------------------------|-----------|--------|-------|-------|-------|--------------|------|
|                             |           | 15 min |       | 1 h   |       | 1 h blocking |      |
|                             | Blood     | 5.3    | 0.75  | 0.96  | 0.2   | 1            | 0.5  |
|                             | Liver     | 1.65   | 0.3   | 0.865 | 0.1   | 1.2          | 0.3  |
|                             | Intestine | 0.84   | 0.185 | 0.475 | 0.05  | 0.4          | 0.1  |
|                             | Spleen    | 1.2    | 0.3   | 0.495 | 0.03  | 0.4          | 0.1  |
|                             | Heart     | 2.05   | 0.55  | 0.33  | 0.008 | 0.51         | 0.03 |
|                             | Lungs     | 3.75   | 0.95  | 0.63  | 0.07  | 1.1          | 0.2  |
|                             | Kidneys   | 5.75   | 0.41  | 3.1   | 0.2   | 2.5          | 0.5  |
|                             | Muscle    | 1.65   | 0.15  | 0.34  | 0.002 | 0.24         | 0.01 |
|                             | Bone      | 1.6    | 0.5   | 1.07  | 0.001 | 0.3          | 0.03 |
|                             | Stomach   | 1.35   | 0.55  | 0.25  | 0.008 | 0.16         | 0    |
|                             | Pancreas  | 1.2    | 0.4   | 0.4   | 0.11  | 0.25         | 0.05 |
|                             | Tumor     | 3.74   | 0.135 | 1.19  | 0.2   | 0.64         | 0.1  |
|                             | Excretion | 32.4   | 6.6   | 74.65 | 18.3  | 84.3         | 5.7  |
